# Supplementary material for: Characterization of blaKPC-2-Carrying Plasmid pR31-KPC from a Pseudomonas aeruginosa Strain Isolated in China
Source: MDPI journal article supplement (doi:10.3390/antibiotics10101234), 2021-10-11
Supplement: s1 [file s1]

## Supplementary Material

**Figure S1.** Schematic maps of p1011-KPC2, p14057A, YLH6\_P3, pP23-KPC, and pR31-KPC. Genes are denoted by arrows, and the backbone and accessory module regions are in different colors. The innermost circle presents GC-skew  $[(G-C)/(G+C)]$ , with a window size of 500 bp and a step size of 20 bp. The next-to-innermost circle presents GC content. The accession numbers of p1011-KPC2, p14057A, YLH6\_P3 and pP23-KPC for reference are MH734334, KY296095, MK882885, CP065418, respectively.

**Figure S2.** The maximum parsimony phylogenetic tree of the 202 *P. aeruginosa* genomes in the GenBank database based on SNP. The strain names, sequence types, the name of carbapenemase genes carried by *P. aeruginosa* were labeled. The column in grey, light green, dark green and red indicate the numbers of carbapenemase genes carried by each isolate were 0,1,2 and 3 respectively.

**Table S1.** Pairwise comparison of *bla*<sub>KPC-2</sub>-carrying plasmids from *P. aeruginosa* using BlastN.

**Table S2.** Beta-lactamase and carbapenemase genes carried by *P. aeruginosa* genomes

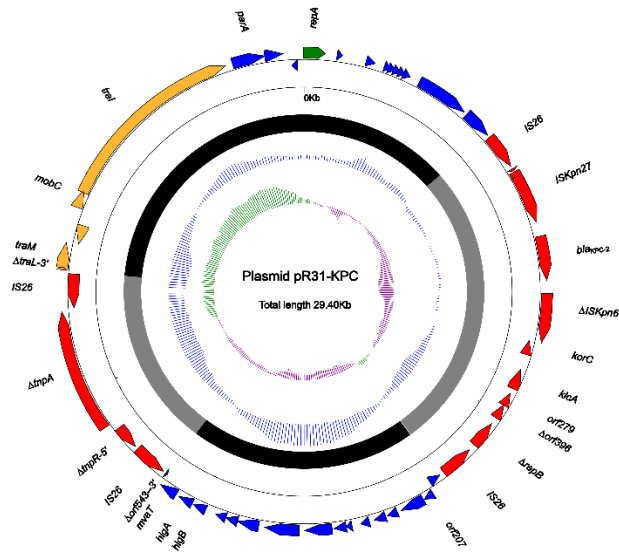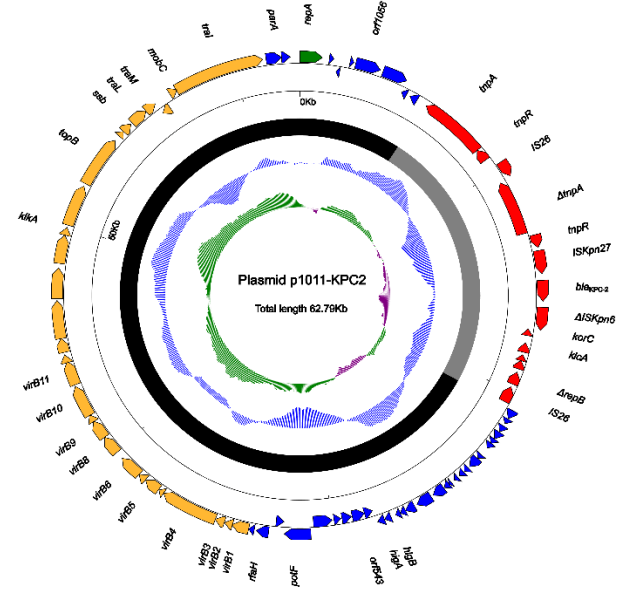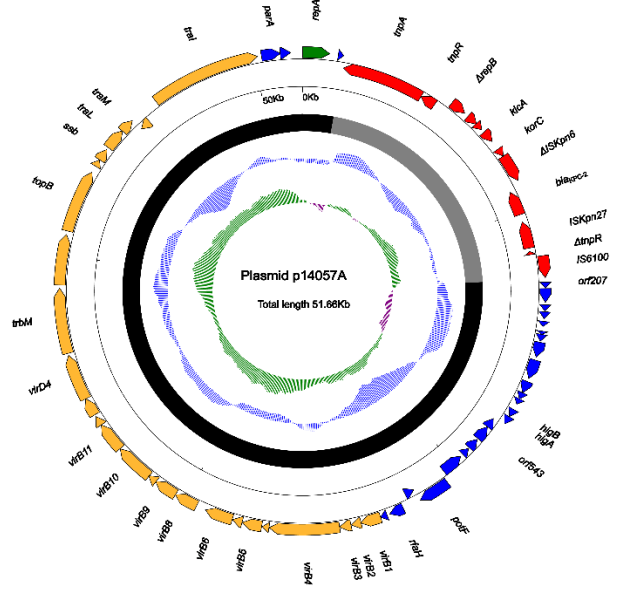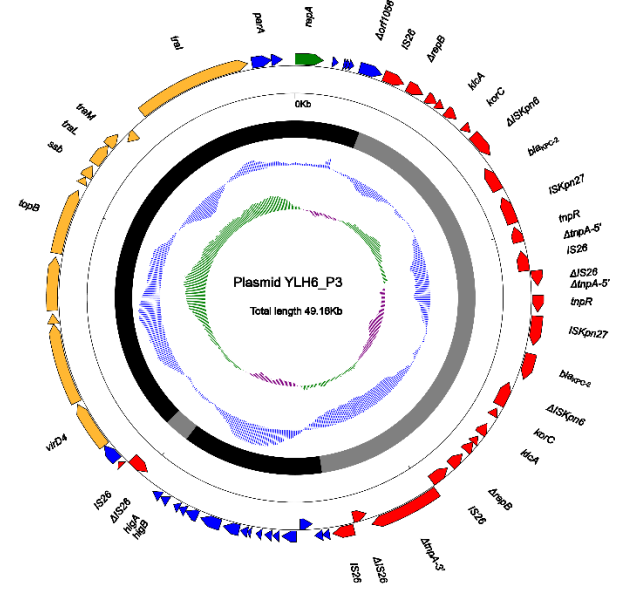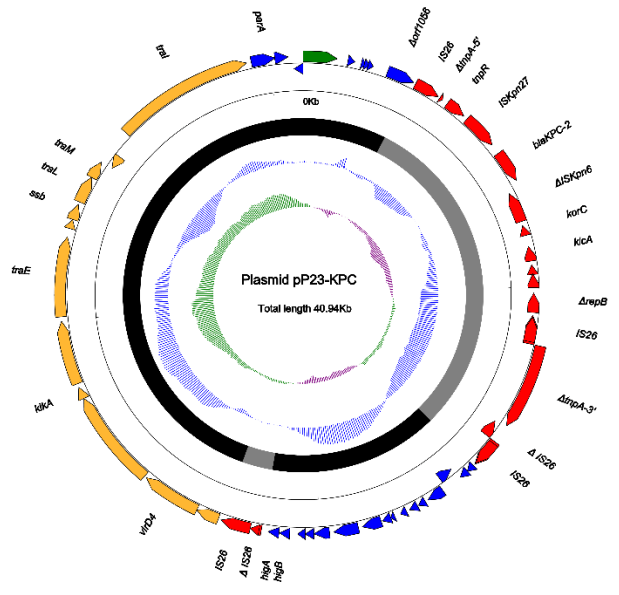

- Plasmid replication
  - Plasmid maintenance
  - Conjugal transfer
  - Accessory modules
- } Backbone

Tree scale: 0.1

Number of ARGs

0

1

2

3

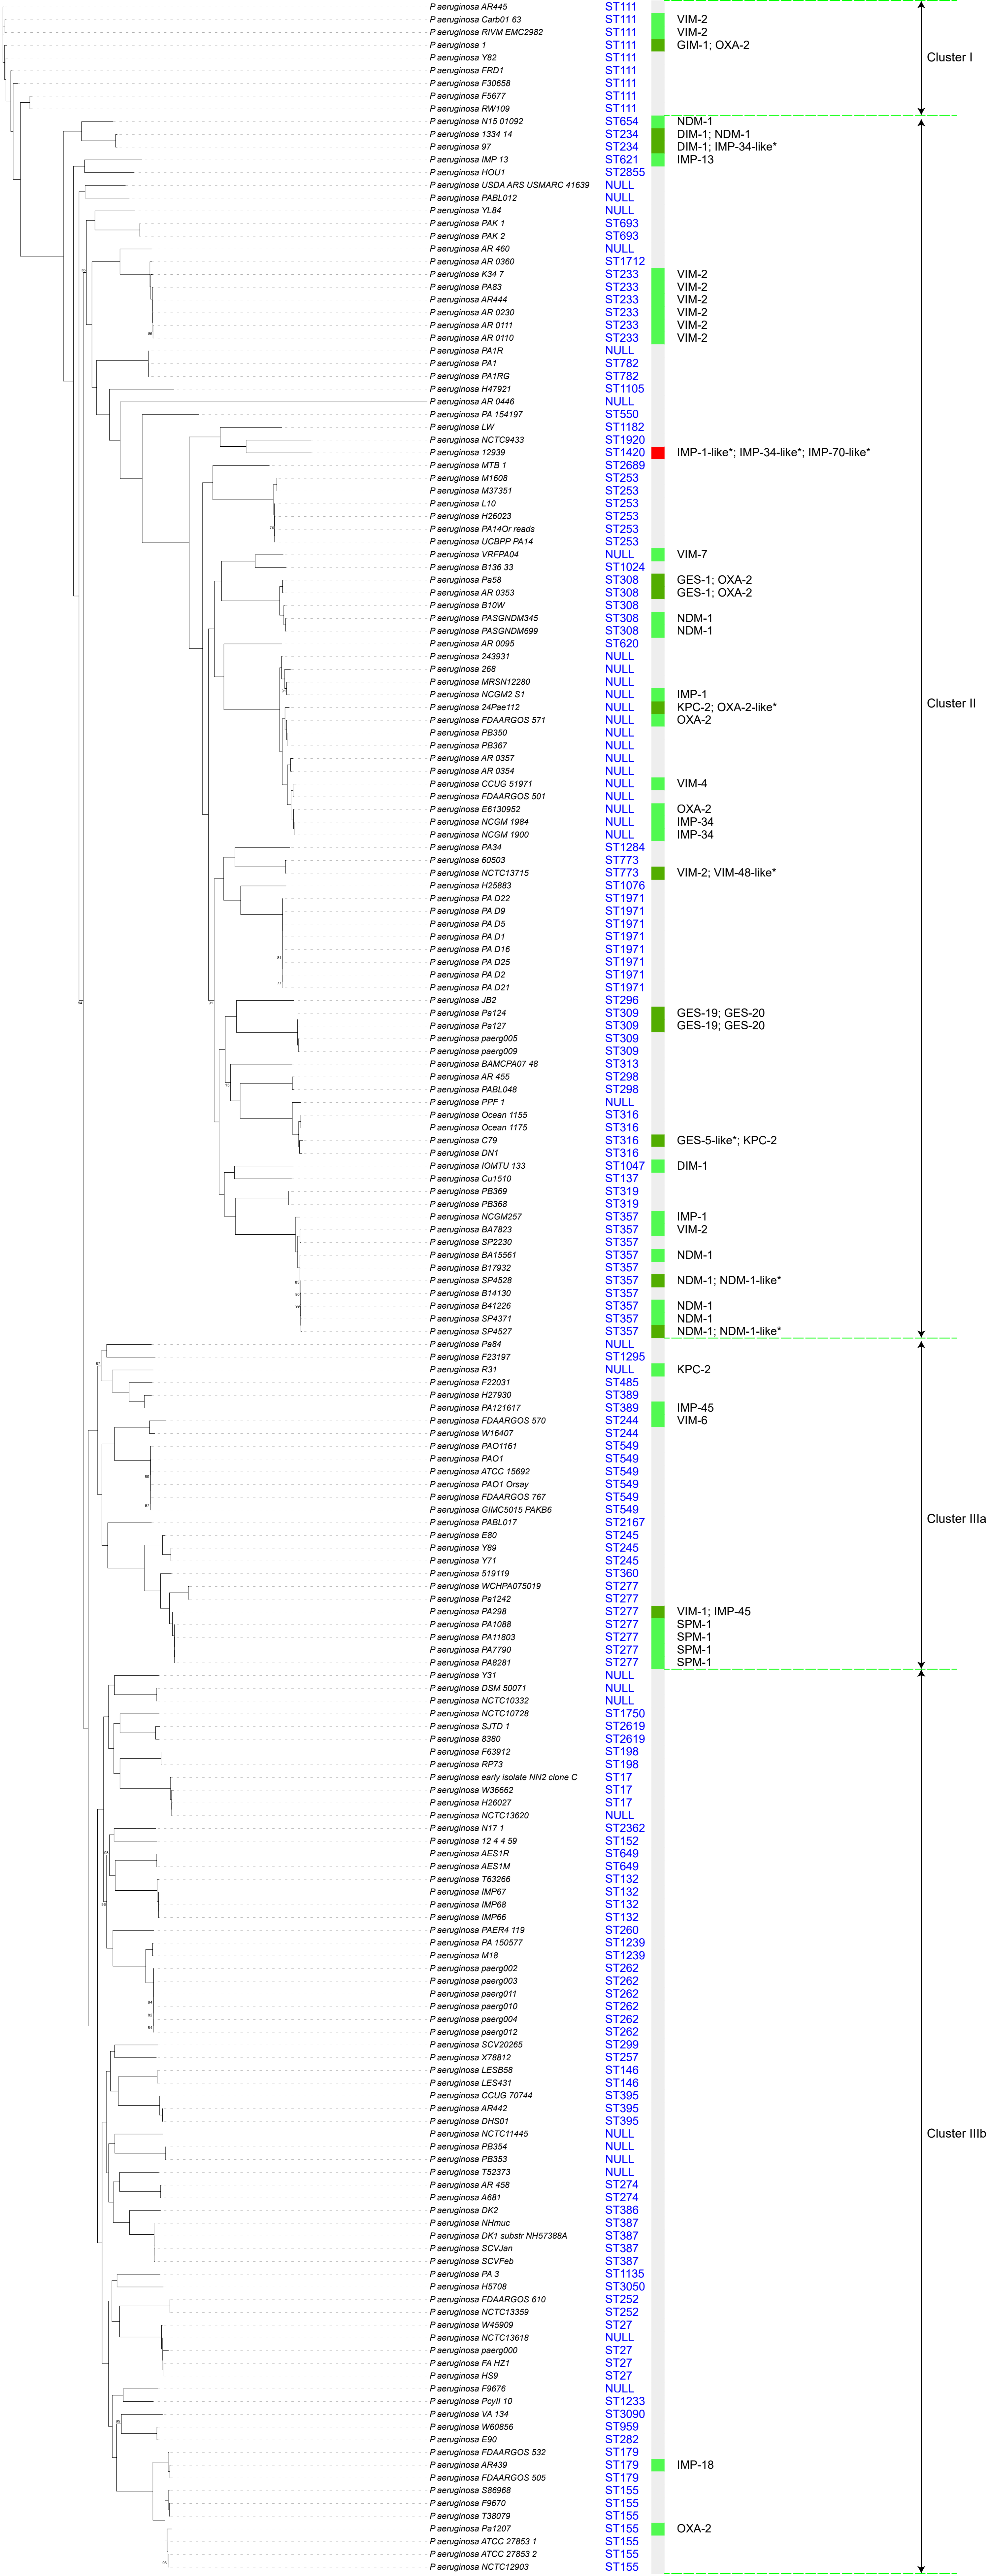

Table S1. Pairwise comparison of *bla*<sub>KPC-2</sub>-carrying plasmids from *Pseudomonas aeruginosa* using BlastN

| (coverage+identity) | YLH6_P3      | p1011-KPC2    | p14057-KPC   | pP23-KPC     | pR31-KPC   |
|---------------------|--------------|---------------|--------------|--------------|------------|
| YLH6_P3             |              | (100%+99.22%) | (85%+98.78%) | (99%+100%)   | (75%+100%) |
| p1011-KPC2          | (61%+99.22%) |               | (84%+99.79%) | (61%+99.22%) | (44%+100%) |
| p14057-KPC          | (60%+98.78%) | (99%+99.79%)  |              | (60%+99.78%) | (40%+100%) |
| pP23-KPC            | (100%+100%)  | (100%+99.22%) | (84%+98.78%) |              | (71%+100%) |
| pR31-KPC            | (95%+100%)   | (100%+100%)   | (78%+100%)   | (95%+100%)   |            |

| Table S2 Beta-lactamase and carbapenemase genes carried by <i>P.aeruginosa</i> genomes based on Resfinder results |                            |                                    |                                                                                                                                                                         |                                                                                     |
|-------------------------------------------------------------------------------------------------------------------|----------------------------|------------------------------------|-------------------------------------------------------------------------------------------------------------------------------------------------------------------------|-------------------------------------------------------------------------------------|
| Strain name                                                                                                       | Genebank accession No.     | Genome component                   | Beta-lactamase (coverage/identity)                                                                                                                                      | Carbapenemase(coverage/identity)                                                    |
| <i>P.aeruginosa</i> 1                                                                                             | NZ_LS998783<br>NZ_LS998784 | Chromosome<br>plasmid<br>(unnamed) | <i>bla</i> <sub>OXA-395</sub> (100/100)<br><i>bla</i> <sub>PAO</sub> (100/99.49)                                                                                        | <i>bla</i> <sub>GIM-1</sub> (100/100)<br><i>bla</i> <sub>OXA-2</sub> (100/100)      |
| <i>P.aeruginosa</i> 24Pae112                                                                                      | NZ_CP029605                | Chromosome                         | <i>bla</i> <sub>OXA-488</sub> (100/99.87)<br><i>bla</i> <sub>PAO</sub> (100/99.24)                                                                                      | <i>bla</i> <sub>KPC-2</sub> (100/100)<br><i>bla</i> <sub>OXA-2/15</sub> (100/99.87) |
| <i>P.aeruginosa</i> 97                                                                                            | NZ_CP031449                | Chromosome                         | <i>bla</i> <sub>OXA-395</sub> (100/99.24)<br><i>bla</i> <sub>PAO</sub> (100/98.99)<br><i>bla</i> <sub>OXA-10</sub> (100/100)<br><i>bla</i> <sub>OXA-129</sub> (100/100) | <i>bla</i> <sub>IMP-34</sub> (100/99.73)<br><i>bla</i> <sub>DIM-1</sub> (100/100)   |
| <i>P.aeruginosa</i> 1334/14                                                                                       | NZ_CP035739                | Chromosome                         | <i>bla</i> <sub>OXA-486</sub> (100/99.74)<br><i>bla</i> <sub>PAO</sub> (100/99.83)<br><i>bla</i> <sub>PME-1</sub> (100/100)<br><i>bla</i> <sub>OXA-10</sub> (100/100)   | <i>bla</i> <sub>DIM-1</sub> (100/100)<br><i>bla</i> <sub>NDM-1</sub> (100/100)      |
| <i>P.aeruginosa</i> 12939                                                                                         | NZ_CP024477                | Chromosome                         | <i>bla</i> <sub>OXA-395</sub> (100/99.87)<br><i>bla</i> <sub>PAO</sub> (100/99.24)                                                                                      | <i>bla</i> <sub>IMP-1/34/70</sub> (100/99.46)                                       |
| <i>P.aeruginosa</i> AR_0110                                                                                       | NZ_CP029745                | Chromosome                         | <i>bla</i> <sub>OXA-486</sub> (100/99.49)<br><i>bla</i> <sub>PAO</sub> (100/99.74)                                                                                      | <i>bla</i> <sub>VIM-2</sub> (100/100)                                               |
| <i>P.aeruginosa</i> AR_0111                                                                                       | NZ_CP032257<br>NZ_CP032256 | Chromosome<br>plasmid<br>(unnamed) | <i>bla</i> <sub>OXA-486</sub> (100/99.74)<br><i>bla</i> <sub>PAO</sub> (100/99.49)<br><i>bla</i> <sub>OXA-4</sub> (100/100)                                             | <i>bla</i> <sub>VIM-2</sub> (100/100)                                               |

|                             |                                           |                                                                    |                                                                                                                                                                        |                                                                                |
|-----------------------------|-------------------------------------------|--------------------------------------------------------------------|------------------------------------------------------------------------------------------------------------------------------------------------------------------------|--------------------------------------------------------------------------------|
| <i>P.aeruginosa</i> AR_0230 | NZ_CP027174<br>NZ_CP027175<br>NZ_CP027176 | Chromosome<br><br>plasmid(unna<br>med)<br><br>plasmid(unna<br>med) | <i>bla</i> <sub>OXA-486</sub> (100/99.74)<br><i>bla</i> <sub>PAO</sub> (100/99.49)<br><i>bla</i> <sub>OXA-4</sub> (100/100)                                            | <i>bla</i> <sub>VIM-2</sub> (100/100)                                          |
| <i>P.aeruginosa</i> AR_0353 | NZ_CP027172<br>NZ_CP027173                | Chromosome<br>plasmid(unna<br>med)                                 | <i>bla</i> <sub>OXA-486</sub> (100/100)<br><i>bla</i> <sub>PAO</sub> (100/99.24)                                                                                       | <i>bla</i> <sub>GES-1</sub> (100/100)<br><i>bla</i> <sub>OXA-2</sub> (100/100) |
| <i>P.aeruginosa</i> AR439   | NZ_CP029097<br>NZ_CP029095<br>NZ_CP029096 | Chromosome<br>plasmid(unna<br>med)<br>plasmid(unna<br>med)         | <i>bla</i> <sub>OXA-396</sub> (100/100)<br><i>bla</i> <sub>PAO</sub> (100/99.58)                                                                                       | <i>bla</i> <sub>IMP-18</sub> (100/100)                                         |
| <i>P.aeruginosa</i> AR444   | NZ_CP029089                               | Chromosome                                                         | <i>bla</i> <sub>OXA-486</sub> (100/99.74)<br><i>bla</i> <sub>PAO</sub> (100/99.49)<br><i>bla</i> <sub>OXA-4</sub> (100/100)                                            | <i>bla</i> <sub>VIM-2</sub> (100/100)                                          |
| <i>P.aeruginosa</i> B41226  | NZ_CP034368                               | Chromosome                                                         | <i>bla</i> <sub>OXA-50</sub> (100/99.36)<br><i>bla</i> <sub>PAO</sub> (100/99.49)<br><i>bla</i> <sub>VEB-1</sub> (100/100)<br><i>bla</i> <sub>OXA-10</sub> (100/99.87) | <i>bla</i> <sub>NDM-1</sub> (100/100)                                          |
| <i>P.aeruginosa</i> BA7823  | NZ_CP032569                               | Chromosome                                                         | <i>bla</i> <sub>OXA-50</sub> (100/99.36)<br><i>bla</i> <sub>PAO</sub> (100/99.49)<br><i>bla</i> <sub>LCR-1</sub> (100/100)                                             | <i>bla</i> <sub>VIM-2</sub> (100/100)                                          |

|                                  |                            |                                    |                                                                                                                                                                            |                                                                                |
|----------------------------------|----------------------------|------------------------------------|----------------------------------------------------------------------------------------------------------------------------------------------------------------------------|--------------------------------------------------------------------------------|
| <i>P.aeruginosa</i> BA15561      | NZ_CP033432                | Chromosome                         | <i>bla</i> <sub>OXA-50</sub> (100/99.36)<br><i>bla</i> <sub>PAO</sub> (100/99.49)<br><i>bla</i> <sub>VEB-1</sub> (100/100)<br><i>bla</i> <sub>OXA-10/246</sub> (100/99.62) | <i>bla</i> <sub>NDM-1</sub> (100/100)                                          |
| <i>P.aeruginosa</i> C79          | NZ_CP040684<br>NZ_CP040685 | Chromosome<br>plasmid (p1)         | <i>bla</i> <sub>OXA-395</sub> (100/100)<br><i>bla</i> <sub>PAO</sub> (100/98.99)                                                                                           | <i>bla</i> <sub>GES-5</sub> (100/100)<br><i>bla</i> <sub>KPC-2</sub> (100/100) |
| <i>P.aeruginosa</i> Carb01 63    | NZ_CP011317                | Chromosome                         | <i>bla</i> <sub>OXA-395</sub> (100/100) <i>bla</i> <sub>PAO</sub><br>(100/99.49) <i>bla</i> <sub>CARB-2</sub><br>(100/100)                                                 | <i>bla</i> <sub>VIM-2</sub> (100/100)                                          |
| <i>P.aeruginosa</i> CCUG 51971   | NZ_CP043328                | Chromosome                         | <i>bla</i> <sub>OXA-488</sub> (100/99.87)<br><i>bla</i> <sub>PAO</sub> (100/99.24)<br><i>bla</i> <sub>OXA-35</sub> (100/100)                                               | <i>bla</i> <sub>VIM-4</sub> (100/100)                                          |
| <i>P.aeruginosa</i> E6130952     | NZ_CP020603<br>NZ_CP020602 | Chromosome<br>plasmid(pJHX6<br>13) | <i>bla</i> <sub>OXA-488</sub> (100/99.87)<br><i>bla</i> <sub>PAO</sub> (100/99.24)                                                                                         | <i>bla</i> <sub>OXA-2</sub> (100/100)                                          |
| <i>P.aeruginosa</i> FDAARGOS_570 | NZ_CP033835<br>NZ_CP033834 | Chromosome<br>plasmid<br>(unnamed) | <i>bla</i> <sub>OXA-396/494</sub> (100/99.62)<br><i>bla</i> <sub>PAO</sub> (100/99.83)<br><i>bla</i> <sub>OXA-10</sub> (100/100)                                           | <i>bla</i> <sub>VIM-6</sub> (100/100)                                          |
| <i>P.aeruginosa</i> FDAARGOS_571 | NZ_CP033833                | Chromosome                         | <i>bla</i> <sub>OXA-488</sub> (100/99.87)<br><i>bla</i> <sub>PAO</sub> (100/99.24)                                                                                         | <i>bla</i> <sub>OXA-2</sub> (100/100)                                          |
| <i>P.aeruginosa</i> IMP-13       | NZ_CP034354<br>NZ_CP034355 | Chromosome<br>plasmid<br>(pPYO_TB) | <i>bla</i> <sub>OXA-50</sub> (100/99.61)<br><i>bla</i> <sub>PAO</sub> (100/99.41)                                                                                          | <i>bla</i> <sub>IMP-13</sub> (100/100)                                         |
| <i>P.aeruginosa</i> IOMTU 133    | NZ_AP017302                | Chromosome                         | <i>bla</i> <sub>OXA-488</sub> (100/100)<br><i>bla</i> <sub>PAO</sub> (100/99.33)                                                                                           | <i>bla</i> <sub>DIM-1</sub> (100/100)                                          |



|                               |                            |                                    |                                                                                                                              |                                                                                   |
|-------------------------------|----------------------------|------------------------------------|------------------------------------------------------------------------------------------------------------------------------|-----------------------------------------------------------------------------------|
| <i>P.aeruginosa</i> K34-7     | NZ_CP029707                | Chromosome<br>plasmid (pK34-7-1)   | <i>bla</i> <sub>OXA-486</sub> (100/99.74)<br><i>bla</i> <sub>PAO</sub> (100/99.49)<br><i>bla</i> <sub>OXA-4</sub> (100/100)  | <i>bla</i> <sub>VIM-2</sub> (100/100)                                             |
| <i>P.aeruginosa</i> N15_01092 | NZ_CP012901                | Chromosome                         | <i>bla</i> <sub>OXA-396</sub> (100/100)<br><i>bla</i> <sub>PAO</sub> (100/99.66)                                             | <i>bla</i> <sub>NDM-1</sub> (100/100)                                             |
| <i>P.aeruginosa</i> NCGM_1900 | NZ_AP014622                | Chromosome                         | <i>bla</i> <sub>OXA-488</sub> (100/99.87)<br><i>bla</i> <sub>PAO</sub> (100/99.24)                                           | <i>bla</i> <sub>IMP-34</sub> (100/100)                                            |
| <i>P.aeruginosa</i> NCGM_1984 | NZ_AP014646                | Chromosome                         | <i>bla</i> <sub>OXA-488</sub> (100/99.87)<br><i>bla</i> <sub>PAO</sub> (100/99.24)                                           | <i>bla</i> <sub>IMP-34</sub> (100/100)                                            |
| <i>P.aeruginosa</i> NCGM2_S1  | NC_017549                  | Chromosome                         | <i>bla</i> <sub>OXA-488</sub> (100/99.87)<br><i>bla</i> <sub>PAO</sub> (100/99.24)<br><i>bla</i> <sub>TEM-1b</sub> (100/100) | <i>bla</i> <sub>IMP-1</sub> (100/100)                                             |
| <i>P.aeruginosa</i> NCGM257   | NZ_AP014651                | Chromosome                         | <i>bla</i> <sub>OXA-50</sub> (100/99.36)<br><i>bla</i> <sub>PAO</sub> (100/99.49)<br><i>bla</i> <sub>OXA-4</sub> (100/100)   | <i>bla</i> <sub>IMP-1</sub> (100/100)                                             |
| <i>P.aeruginosa</i> NCTC13715 | NZ_LR134330                | Chromosome                         | <i>bla</i> <sub>OXA-395</sub> (100/99.87)<br><i>bla</i> <sub>PAO</sub> (100/99.33)<br><i>bla</i> <sub>OXA-10</sub> (100/100) | <i>bla</i> <sub>VIM-2</sub> (100/100)<br><i>bla</i> <sub>VIM-48</sub> (100/99.86) |
| <i>P.aeruginosa</i> Pa58      | NZ_CP021775                | Chromosome                         | <i>bla</i> <sub>OXA-488</sub> (100/100)<br><i>bla</i> <sub>PAO</sub> (100/99.24)                                             | <i>bla</i> <sub>GES-1</sub> (100/100)<br><i>bla</i> <sub>OXA-2</sub> (100/100)    |
| <i>P.aeruginosa</i> PA83      | NZ_CP017293<br>NZ_CP017294 | Chromosome<br>plasmid<br>(unnamed) | <i>bla</i> <sub>OXA-486</sub> (100/99.74)<br><i>bla</i> <sub>PAO</sub> (100/99.49)<br><i>bla</i> <sub>OXA-4</sub> (100/100)  | <i>bla</i> <sub>VIM-2</sub> (100/100)                                             |



|                             |                            |                                    |                                                                                                                                     |                                                                                  |
|-----------------------------|----------------------------|------------------------------------|-------------------------------------------------------------------------------------------------------------------------------------|----------------------------------------------------------------------------------|
| <i>P.aeruginosa</i> Pa124   | NZ_CP021774                | Chromosome                         | <i>bla</i> <sub>OXA-50</sub> (100/99.23)<br><i>bla</i> <sub>PAO</sub> (100/99.24)                                                   | <i>bla</i> <sub>GES-19</sub> (100/100)<br><i>bla</i> <sub>GES-20</sub> (100/100) |
| <i>P.aeruginosa</i> Pa127   | NZ_CP022000                | Chromosome                         | <i>bla</i> <sub>OXA-50</sub> (100/99.23)<br><i>bla</i> <sub>PAO</sub> (100/99.24)                                                   | <i>bla</i> <sub>GES-19</sub> (100/100)<br><i>bla</i> <sub>GES-20</sub> (100/100) |
| <i>P.aeruginosa</i> PA298   | NZ_CP040127<br>NZ_CP040126 | Chromosome<br>plasmid<br>(pBM908)  | <i>bla</i> <sub>OXA-396/494</sub> (100/99.62)<br><i>bla</i> <sub>PAO</sub> (100/99.58)<br><i>bla</i> <sub>OXA-1</sub> (100/99.87)   | <i>bla</i> <sub>VIM-1</sub> (100/100)<br><i>bla</i> <sub>IMP-45</sub> (100/100)  |
| <i>P.aeruginosa</i> PA1088  | NZ_CP015001                | Chromosome                         | <i>bla</i> <sub>OXA-396/494</sub><br>(100/99.62) <i>bla</i> <sub>PAO</sub><br>(100/99.58) <i>bla</i> <sub>OXA-56</sub><br>(100/100) | <i>bla</i> <sub>SPM-1</sub> (100/100)                                            |
| <i>P.aeruginosa</i> Pa1207  | NZ_CP022001                | Chromosome                         | <i>bla</i> <sub>OXA-396</sub> (100/100)<br><i>bla</i> <sub>PAO</sub> (100/99.24)                                                    | <i>bla</i> <sub>OXA-2</sub> (100/100)                                            |
| <i>P.aeruginosa</i> PA7790  | NZ_CP014999<br>NZ_CP015000 | Chromosome<br>plasmid<br>(pPA7790) | <i>bla</i> <sub>OXA-396/494</sub> (100/99.62)<br><i>bla</i> <sub>PAO</sub> (100/99.58)<br><i>bla</i> <sub>OXA-56</sub> (100/100)    | <i>bla</i> <sub>SPM-1</sub> (100/100)                                            |
| <i>P.aeruginosa</i> PA8281  | NZ_CP015002                | Chromosome                         | <i>bla</i> <sub>OXA-396/494</sub> (100/99.62)<br><i>bla</i> <sub>PAO</sub> (100/99.58)<br><i>bla</i> <sub>OXA-56</sub> (100/100)    | <i>bla</i> <sub>SPM-1</sub> (100/100)<br><i>bla</i> <sub>SPM-1</sub> (100/100)   |
| <i>P.aeruginosa</i> PA11803 | NZ_CP015003                | Chromosome                         | <i>bla</i> <sub>OXA-396/494</sub> (100/99.62)<br><i>bla</i> <sub>PAO</sub> (100/99.58)<br><i>bla</i> <sub>OXA-56</sub> (100/100)    | <i>bla</i> <sub>SPM-1</sub> (100/100)                                            |

|                                  |                            |                                      |                                                                                                                                                                                                               |                                                                                     |
|----------------------------------|----------------------------|--------------------------------------|---------------------------------------------------------------------------------------------------------------------------------------------------------------------------------------------------------------|-------------------------------------------------------------------------------------|
| <i>P.aeruginosa</i> PA121617     | NZ_CP016214<br>NZ_CP016215 | Chromosome<br>plasmid<br>(pBM413)    | <i>bla</i> <sub>OXA-50</sub> (100/99.87)<br><i>bla</i> <sub>PAO</sub> (100/99.92)<br><i>bla</i> <sub>OXA-1</sub> (100/100)                                                                                    | <i>bla</i> <sub>IMP-45</sub> (100/100)                                              |
| <i>P.aeruginosa</i> PASGNDM345   | NZ_CP020703                | Chromosome                           | <i>bla</i> <sub>OXA-488</sub> (100/100)<br><i>bla</i> <sub>PAO</sub> (100/99.24)                                                                                                                              | <i>bla</i> <sub>NDM-1</sub> (100/100)                                               |
| <i>P.aeruginosa</i> PASGNDM699   | NZ_CP020704                | Chromosome                           | <i>bla</i> <sub>OXA-488</sub> (100/100)<br><i>bla</i> <sub>PAO</sub> (100/99.24)                                                                                                                              | <i>bla</i> <sub>NDM-1</sub> (100/100)                                               |
| <i>P.aeruginosa</i> R31          | NZ_CP061850<br>NZ_CP061851 | Chromosome<br>plasmid (pR31-<br>KPC) | <i>bla</i> <sub>OXA-486</sub> (100/99.87)<br><i>bla</i> <sub>PAO</sub> (100/99.58)                                                                                                                            | <i>bla</i> <sub>KPC-2</sub> (100/100)                                               |
| <i>P.aeruginosa</i> RIVM_EMC2982 | NZ_CP016955                | Chromosome                           | <i>bla</i> <sub>OXA-395</sub> (100/100)<br><i>bla</i> <sub>PAO</sub> (100/99.49)<br><i>bla</i> <sub>CARB-2</sub> (100/100)                                                                                    | <i>bla</i> <sub>VIM-2</sub> (100/100)                                               |
| <i>P.aeruginosa</i> SP4371       | NZ_CP034369                | Chromosome                           | <i>bla</i> <sub>OXA-50</sub> (100/99.36)<br><i>bla</i> <sub>PAO</sub> (100/99.49)<br><i>bla</i> <sub>VEB-1</sub> (100/100)<br><i>bla</i> <sub>OXA-10</sub> (100/100)<br><i>bla</i> <sub>PME-1</sub> (100/100) | <i>bla</i> <sub>NDM-1</sub> (100/100)<br><i>bla</i> <sub>NDM-1</sub> (100/100)      |
| <i>P.aeruginosa</i> SP4527       | NZ_CP034409                | Chromosome                           | <i>bla</i> <sub>OXA-50</sub> (100/99.36)<br><i>bla</i> <sub>PAO</sub> (100/99.49)<br><i>bla</i> <sub>VEB-1</sub> (100/100)<br><i>bla</i> <sub>OXA-10</sub> (100/100)<br><i>bla</i> <sub>PME-1</sub> (100/100) | <i>bla</i> <sub>NDM-1</sub> (100/100)<br><i>bla</i> <sub>NDM-1/11</sub> (100/99.87) |

|                                |                            |                                        |                                                                                                                                                                                                               |                                                                                     |
|--------------------------------|----------------------------|----------------------------------------|---------------------------------------------------------------------------------------------------------------------------------------------------------------------------------------------------------------|-------------------------------------------------------------------------------------|
| <i>P.aeruginosa</i> SP4528     | NZ_CP033439                | Chromosome                             | <i>bla</i> <sub>OXA-50</sub> (100/99.36)<br><i>bla</i> <sub>PAO</sub> (100/99.49)<br><i>bla</i> <sub>VEB-1</sub> (100/100)<br><i>bla</i> <sub>OXA-10</sub> (100/100)<br><i>bla</i> <sub>PME-1</sub> (100/100) | <i>bla</i> <sub>NDM-1</sub> (100/100)<br><i>bla</i> <sub>NDM-1/11</sub> (100/99.87) |
| <i>P.aeruginosa</i> VRFPA04    | NZ_CP008739                | Chromosome                             | <i>bla</i> <sub>OXA-488</sub> (100/100)<br><i>bla</i> <sub>PAO</sub> (100/100)<br><i>bla</i> <sub>TEM-1b</sub> (100/100)                                                                                      | <i>bla</i> <sub>VIM-2</sub> (100/100)                                               |
| <i>P.aeruginosa</i> 1705-19119 | NZ_CP041773<br>NZ_MN208061 | Chromosome<br>plasmid<br>(p519119-DIM) | <i>bla</i> <sub>OXA-486</sub> (100/99.49)<br><i>bla</i> <sub>PAO</sub> (100/99.58)<br><i>bla</i> <sub>OXA-4</sub> (100/100)                                                                                   | <i>bla</i> <sub>DIM-1</sub> (100/99.73)                                             |
| <i>P.aeruginosa</i> A681       | NZ_CP041771NZ_MF344570     | Chromosome<br>plasmid (pA681-IMP)      | <i>bla</i> <sub>OXA-486</sub> (100/99.87)<br><i>bla</i> <sub>PAO</sub> (100/99.33)<br><i>bla</i> <sub>PER-1</sub> (100/100)<br><i>bla</i> <sub>OXA-1</sub> (100/100)                                          | <i>bla</i> <sub>IMP-45</sub> (100/100)                                              |
| <i>P.aeruginosa</i> SP2230     | NZ_CP034434                | Chromosome                             | <i>bla</i> <sub>OXA-50</sub> (100/99.36)<br><i>bla</i> <sub>PAO</sub> (100/99.49)<br><i>bla</i> <sub>PAO</sub> (100/98.91)                                                                                    | Not detected                                                                        |
| <i>P.aeruginosa</i> B17932     | NZ_CP034436                | Chromosome                             | <i>bla</i> <sub>OXA-50</sub> (100/99.36)<br><i>bla</i> <sub>PAO</sub> (100/99.49)<br><i>bla</i> <sub>OXA-10/233</sub> (100/99.87)<br><i>bla</i> <sub>VEB-1</sub> (100/100)                                    | Not detected                                                                        |
| <i>P.aeruginosa</i> 12-4-4(59) | NZ_CP013696                | Chromosome                             | <i>bla</i> <sub>OXA-50</sub> (100/99.62)<br><i>bla</i> <sub>PAO</sub> (100/99.58)                                                                                                                             | Not detected                                                                        |

|                             |             |            |                                                                                                                                                                       |              |
|-----------------------------|-------------|------------|-----------------------------------------------------------------------------------------------------------------------------------------------------------------------|--------------|
| <i>P.aeruginosa</i> 268     | NZ_CP032761 | Chromosome | <i>bla</i> <sub>OXA-488</sub> (100/99.87)<br><i>bla</i> <sub>PAO</sub> (100/99.24)                                                                                    | Not detected |
| <i>P.aeruginosa</i> 8380    | NZ_AP014839 | Chromosome | <i>bla</i> <sub>OXA-486</sub> (100/99.87)<br><i>bla</i> <sub>PAO</sub> (100/99.58)                                                                                    | Not detected |
| <i>P.aeruginosa</i> 60503   | NZ_CP041774 | Chromosome | <i>bla</i> <sub>OXA-395</sub> (100/99.87)<br><i>bla</i> <sub>PAO</sub> (100/99.33)                                                                                    | Not detected |
| <i>P.aeruginosa</i> 243931  | NZ_CP041772 | Chromosome | <i>bla</i> <sub>OXA-488</sub> (100/99.87)<br><i>bla</i> <sub>PAO</sub> (100/99.24)                                                                                    | Not detected |
| <i>P.aeruginosa</i> AES1M   | NZ_CP037925 | Chromosome | <i>bla</i> <sub>OXA-50/396/494</sub> (100/99.74)<br><i>bla</i> <sub>PAO</sub> (100/99.58)                                                                             | Not detected |
| <i>P.aeruginosa</i> AES1R   | NZ_CP037926 | Chromosome | <i>bla</i> <sub>OXA-50/396/494</sub> (100/99.74)<br><i>bla</i> <sub>PAO</sub> (100/99.58)                                                                             | Not detected |
| <i>P.aeruginosa</i> AR_0095 | NZ_CP027538 | Chromosome | <i>bla</i> <sub>OXA-395</sub> (100/99.36)<br><i>bla</i> <sub>PAO</sub> (100/99.33)                                                                                    | Not detected |
| <i>P.aeruginosa</i> AR_0354 | NZ_CP027171 | Chromosome | <i>bla</i> <sub>OXA-488</sub> (100/99.87)<br><i>bla</i> <sub>PAO</sub> (100/99.24)                                                                                    | Not detected |
| <i>P.aeruginosa</i> AR_0357 | NZ_CP027166 | Chromosome | <i>bla</i> <sub>OXA-488</sub> (100/99.87)<br><i>bla</i> <sub>PAO</sub> (100/99.24)<br><i>bla</i> <sub>OXA-10</sub> (100/100)<br><i>bla</i> <sub>VEB-1</sub> (100/100) | Not detected |
| <i>P.aeruginosa</i> AR_0360 | NZ_CP027165 | Chromosome | <i>bla</i> <sub>OXA-486</sub> (100/99.74)<br><i>bla</i> <sub>PAO</sub> (100/99.49)                                                                                    | Not detected |
| <i>P.aeruginosa</i> AR_0446 | NZ_CP029660 | Chromosome | <i>bla</i> <sub>OXA-50</sub> (100/98.85)<br><i>bla</i> <sub>PAO</sub> (100/97.73)                                                                                     | Not detected |

|                                  |             |            |                                                                                                                                                                     |              |
|----------------------------------|-------------|------------|---------------------------------------------------------------------------------------------------------------------------------------------------------------------|--------------|
| <i>P.aeruginosa</i> AR_455       | NZ_CP030328 | Chromosome | <i>bla</i> <sub>OXA-395</sub> (100/99.61)<br><i>bla</i> <sub>PAO</sub> (100/99.24)                                                                                  | Not detected |
| <i>P.aeruginosa</i> AR_458       | NZ_CP030327 | Chromosome | <i>bla</i> <sub>OXA-486</sub> (100/99.87)<br><i>bla</i> <sub>PAO</sub> (100/99.24)                                                                                  | Not detected |
| <i>P.aeruginosa</i> AR_460       | NZ_CP030351 | Chromosome | <i>bla</i> <sub>OXA-486</sub> (100/99.74)<br><i>bla</i> <sub>PAO</sub> (100/99.24)                                                                                  | Not detected |
| <i>P.aeruginosa</i> AR442        | NZ_CP029090 | Chromosome | <i>bla</i> <sub>OXA-488</sub> (100/99.49)<br><i>bla</i> <sub>PAO</sub> (100/99.58)                                                                                  | Not detected |
| <i>P.aeruginosa</i> AR445        | NZ_CP029088 | Chromosome | <i>bla</i> <sub>OXA-395</sub> (100/100) <i>bla</i> <sub>OXA-9</sub><br>(100/100) <i>bla</i> <sub>CARB-2</sub><br>(100/100) <i>bla</i> <sub>PAO</sub><br>(100/99.49) | Not detected |
| <i>P.aeruginosa</i> ATCC 15692   | NZ_CP017149 | Chromosome | <i>bla</i> <sub>OXA-50</sub> (100/99.87)<br><i>bla</i> <sub>PAO</sub> (100/100)                                                                                     | Not detected |
| <i>P.aeruginosa</i> ATCC 27853-1 | NZ_CP015117 | Chromosome | <i>bla</i> <sub>OXA-396</sub> (100/100)<br><i>bla</i> <sub>PAO</sub> (100/99.24)                                                                                    | Not detected |
| <i>P.aeruginosa</i> ATCC 27853-2 | NZ_CP011857 | Chromosome | <i>bla</i> <sub>OXA-396</sub> (100/100)<br><i>bla</i> <sub>PAO</sub> (100/99.24)                                                                                    | Not detected |
| <i>P.aeruginosa</i> B10W         | NZ_CP017969 | Chromosome | <i>bla</i> <sub>OXA-488</sub> (100/100)<br><i>bla</i> <sub>PAO</sub> (100/99.24)                                                                                    | Not detected |
| <i>P.aeruginosa</i> B136-33      | NC_020912   | Chromosome | <i>bla</i> <sub>OXA-488</sub> (100/99.87)<br><i>bla</i> <sub>PAO</sub> (100/99.24)                                                                                  | Not detected |

|                                            |             |            |                                                                                                                                                                      |              |
|--------------------------------------------|-------------|------------|----------------------------------------------------------------------------------------------------------------------------------------------------------------------|--------------|
| <i>P.aeruginosa</i> B14130                 | NZ_CP034435 | Chromosome | <i>bla</i> <sub>OXA-50</sub> (100/99.36)<br><i>bla</i> <sub>PAO</sub> (100/99.49)<br><i>bla</i> <sub>OXA-10</sub> (100/100)<br><i>bla</i> <sub>VEB-1</sub> (100/100) | Not detected |
| <i>P.aeruginosa</i> BAMCPA07-48            | NZ_CP015377 | Chromosome | <i>bla</i> <sub>OXA-488</sub> (100/99.87)<br><i>bla</i> <sub>PAO</sub> (100/98.99)                                                                                   | Not detected |
| <i>P.aeruginosa</i> CCUG 70744             | NZ_CP023255 | Chromosome | <i>bla</i> <sub>OXA-488</sub> (100/99.49)<br><i>bla</i> <sub>PAO</sub> (100/99.58)                                                                                   | Not detected |
| <i>P.aeruginosa</i> Cu1510                 | NZ_CP013144 | Chromosome | <i>bla</i> <sub>OXA-488</sub> (100/100)<br><i>bla</i> <sub>PAO</sub> (100/99.49)                                                                                     | Not detected |
| <i>P.aeruginosa</i> DHS01                  | NZ_CP013993 | Chromosome | <i>bla</i> <sub>OXA-488</sub> (100/99.49)<br><i>bla</i> <sub>PAO</sub> (100/99.58)                                                                                   | Not detected |
| <i>P.aeruginosa</i> DK1<br>substr.NH57388A | NZ_LN870292 | Chromosome | <i>bla</i> <sub>OXA-396/494</sub> (100/99.61)<br><i>bla</i> <sub>PAO</sub> (100/99.58)                                                                               | Not detected |
| <i>P.aeruginosa</i> DK2                    | NC_018080   | Chromosome | <i>bla</i> <sub>OXA-396/494</sub> (100/99.61)<br><i>bla</i> <sub>PAO</sub> (100/99.33)                                                                               | Not detected |
| <i>P.aeruginosa</i> DN1                    | NZ_CP017099 | Chromosome | <i>bla</i> <sub>OXA-395</sub> (100/100)<br><i>bla</i> <sub>PAO</sub> (100/98.9)                                                                                      | Not detected |
| <i>P.aeruginosa</i> DSM 50071              | NZ_CP012001 | Chromosome | <i>bla</i> <sub>OXA-50/396/494</sub> (100/99.74)<br><i>bla</i> <sub>PAO</sub> (100/99.58)                                                                            | Not detected |
| <i>P.aeruginosa</i> E80                    | NZ_CP031677 | Chromosome | <i>bla</i> <sub>OXA-396/494</sub> (100/99.61)<br><i>bla</i> <sub>PAO</sub> (100/99.58)                                                                               | Not detected |
| <i>P.aeruginosa</i> E90                    | NZ_CP044006 | Chromosome | <i>bla</i> <sub>OXA-50</sub> (100/99.87)<br><i>bla</i> <sub>PAO</sub> (100/99.41)                                                                                    | Not detected |

|                                                   |             |            |                                                                                        |              |
|---------------------------------------------------|-------------|------------|----------------------------------------------------------------------------------------|--------------|
| <i>P.aeruginosa</i> early isolate<br>NN2(clone C) | NZ_LT883143 | Chromosome | <i>bla</i> <sub>OXA-50</sub> (100/100)<br><i>bla</i> <sub>PAO</sub> (100/99.66)        | Not detected |
| <i>P.aeruginosa</i> F5677                         | NZ_CP026680 | Chromosome | <i>bla</i> <sub>OXA-395</sub> (100/100)<br><i>bla</i> <sub>PAO</sub> (100/99.83)       | Not detected |
| <i>P.aeruginosa</i> F9670                         | NZ_CP008873 | Chromosome | <i>bla</i> <sub>OXA-396</sub> (100/100)<br><i>bla</i> <sub>PAO</sub> (100/99.24)       | Not detected |
| <i>P.aeruginosa</i> F9676                         | NZ_CP012066 | Chromosome | <i>bla</i> <sub>OXA-50/494</sub> (100/99.74)<br><i>bla</i> <sub>PAO</sub> (100/99.58)  | Not detected |
| <i>P.aeruginosa</i> F22031                        | NZ_CP007399 | Chromosome | <i>bla</i> <sub>OXA-50</sub> (100/99.87)<br><i>bla</i> <sub>PAO</sub> (100/99.83)      | Not detected |
| <i>P.aeruginosa</i> F23197                        | NZ_CP008856 | Chromosome | <i>bla</i> <sub>OXA-486</sub> (100/99.61) <i>bla</i> <sub>PAO</sub><br>(100/99.66)     | Not detected |
| <i>P.aeruginosa</i> F30658                        | NZ_CP008857 | Chromosome | <i>bla</i> <sub>OXA-395</sub> (100/100)<br><i>bla</i> <sub>PAO</sub> (100/99.49)       | Not detected |
| <i>P.aeruginosa</i> F63912                        | NZ_CP008858 | Chromosome | <i>bla</i> <sub>OXA-50</sub> (100/100)<br><i>bla</i> <sub>PAO</sub> (100/99.74)        | Not detected |
| <i>P.aeruginosa</i> FA-HZ1                        | NZ_CP017353 | Chromosome | <i>bla</i> <sub>OXA-396/494</sub> (100/99.74)<br><i>bla</i> <sub>PAO</sub> (100/99.49) | Not detected |
| <i>P.aeruginosa</i> FDAARGOS_501                  | NZ_CP033843 | Chromosome | <i>bla</i> <sub>OXA-488</sub> (100/99.87)<br><i>bla</i> <sub>PAO</sub> (100/99.24)     | Not detected |
| <i>P.aeruginosa</i> FDAARGOS_505                  | NZ_CP033832 | Chromosome | <i>bla</i> <sub>OXA-395</sub> (100/100)<br><i>bla</i> <sub>PAO</sub> (100/99.58)       | Not detected |
| <i>P.aeruginosa</i> FDAARGOS_532                  | NZ_CP033771 | Chromosome | <i>bla</i> <sub>OXA-396</sub> (100/100)<br><i>bla</i> <sub>PAO</sub> (100/99.58)       | Not detected |



|                                       |                            |                                    |                                                                                        |              |
|---------------------------------------|----------------------------|------------------------------------|----------------------------------------------------------------------------------------|--------------|
| <i>P.aeruginosa</i> FDAARGOS_610      | NZ_CP041013                | Chromosome                         | <i>bla</i> <sub>OXA-486</sub> (100/99.74)<br><i>bla</i> <sub>PAO</sub> (100/99.66)     | Not detected |
| <i>P.aeruginosa</i> FDAARGOS_767      | NZ_CP041008                | Chromosome                         | <i>bla</i> <sub>OXA-50</sub> (100/99.87)<br><i>bla</i> <sub>PAO</sub> (100/100)        | Not detected |
| <i>P.aeruginosa</i> FRD1              | NZ_CP010555                | Chromosome                         | <i>bla</i> <sub>OXA-395</sub> (100/100)<br><i>bla</i> <sub>PAO</sub> (100/99.49)       | Not detected |
| <i>P.aeruginosa</i><br>GIMC5015:PAKB6 | NZ_CP034429                | Chromosome                         | <i>bla</i> <sub>OXA-50</sub> (100/99.87)<br><i>bla</i> <sub>PAO</sub> (100/100)        | Not detected |
| <i>P.aeruginosa</i> H5708             | NZ_CP008859                | Chromosome                         | <i>bla</i> <sub>OXA-486</sub> (100/99.74)<br><i>bla</i> <sub>PAO</sub> (100/99.74)     | Not detected |
| <i>P.aeruginosa</i> H25883            | NZ_CP033686                | Chromosome                         | <i>bla</i> <sub>OXA-395</sub> (100/99.74)<br><i>bla</i> <sub>PAO</sub> (100/99.33)     | Not detected |
| <i>P.aeruginosa</i> H26023            | NZ_CP033685                | Chromosome                         | <i>bla</i> <sub>OXA-488</sub> (100/100)<br><i>bla</i> <sub>PAO</sub> (100/99.33)       | Not detected |
| <i>P.aeruginosa</i> H26027            | NZ_CP033684                | Chromosome                         | <i>bla</i> <sub>OXA-50</sub> (100/100)<br><i>bla</i> <sub>PAO</sub> (100/99.66)        | Not detected |
| <i>P.aeruginosa</i> H27930            | NZ_CP008860                | Chromosome                         | <i>bla</i> <sub>OXA-50</sub> (100/99.74)<br><i>bla</i> <sub>PAO</sub> (100/99.91)      | Not detected |
| <i>P.aeruginosa</i> H47921            | NZ_CP008861                | Chromosome                         | <i>bla</i> <sub>OXA-395</sub> (100/99.49)<br><i>bla</i> <sub>PAO</sub> (100/99.58)     | Not detected |
| <i>P.aeruginosa</i> HOU1              | NZ_CP042269<br>NZ_CP042268 | Chromosome<br>plasmid<br>(pHOU1-1) | <i>bla</i> <sub>OXA-396/494</sub> (100/99.74)<br><i>bla</i> <sub>PAO</sub> (100/99.41) | Not detected |

|                            |             |            |                                                                                        |              |
|----------------------------|-------------|------------|----------------------------------------------------------------------------------------|--------------|
| <i>P.aeruginosa</i> HS9    | NZ_CP030861 | Chromosome | <i>bla</i> <sub>OXA-396/494</sub> (100/99.74)<br><i>bla</i> <sub>PAO</sub> (100/99.49) | Not detected |
| <i>P.aeruginosa</i> IMP66  | NZ_CP028959 | Chromosome | <i>bla</i> <sub>OXA-396/494</sub> (100/99.74)<br><i>bla</i> <sub>PAO</sub> (100/99.66) | Not detected |
| <i>P.aeruginosa</i> IMP67  | NZ_CP028848 | Chromosome | <i>bla</i> <sub>OXA-396/494</sub> (100/99.74)<br><i>bla</i> <sub>PAO</sub> (100/99.66) | Not detected |
| <i>P.aeruginosa</i> IMP68  | NZ_CP028849 | Chromosome | <i>bla</i> <sub>OXA-396/494</sub> (100/99.74)<br><i>bla</i> <sub>PAO</sub> (100/99.66) | Not detected |
| <i>P.aeruginosa</i> JB2    | NZ_CP028917 | Chromosome | <i>bla</i> <sub>OXA-488</sub> (100/99.74)<br><i>bla</i> <sub>PAO</sub> (100/99.66)     | Not detected |
| <i>P.aeruginosa</i> L10    | NZ_CP019338 | Chromosome | <i>bla</i> <sub>OXA-488</sub> (100/100)<br><i>bla</i> <sub>PAO</sub> (100/99.33)       | Not detected |
| <i>P.aeruginosa</i> LES431 | NC_023066   | Chromosome | <i>bla</i> <sub>OXA-50</sub> (100/99.87)<br><i>bla</i> <sub>PAO</sub> (100/99.74)      | Not detected |
| <i>P.aeruginosa</i> LESB58 | NC_011770   | Chromosome | <i>bla</i> <sub>OXA-50</sub> (100/99.87)<br><i>bla</i> <sub>PAO</sub> (100/99.74)      | Not detected |
| <i>P.aeruginosa</i> LW     | NZ_CP022478 | Chromosome | <i>bla</i> <sub>OXA-395</sub> (100/99.87)<br><i>bla</i> <sub>PAO</sub> (100/99.07)     | Not detected |
| <i>P.aeruginosa</i> M18    | NC_017548   | Chromosome | <i>bla</i> <sub>OXA-488</sub> (100/99.49)<br><i>bla</i> <sub>PAO</sub> (100/99.58)     | Not detected |
| <i>P.aeruginosa</i> M1608  | NZ_CP008862 | Chromosome | <i>bla</i> <sub>OXA-395</sub> (100/99.87)<br><i>bla</i> <sub>PAO</sub> (100/99.49)     | Not detected |
| <i>P.aeruginosa</i> M37351 | NZ_CP008863 | Chromosome | <i>bla</i> <sub>OXA-488</sub> (100/100)<br><i>bla</i> <sub>PAO</sub> (100/99.33)       | Not detected |

|                               |             |            |                                                                                           |              |
|-------------------------------|-------------|------------|-------------------------------------------------------------------------------------------|--------------|
| <i>P.aeruginosa</i> MRSN12280 | NZ_CP028162 | Chromosome | <i>bla</i> <sub>OXA-488</sub> (100/99.87)<br><i>bla</i> <sub>PAO</sub> (100/99.24)        | Not detected |
| <i>P.aeruginosa</i> MTB-1     | NC_023019   | Chromosome | <i>bla</i> <sub>OXA-488</sub> (100/100)<br><i>bla</i> <sub>PAO</sub> (100/99.24)          | Not detected |
| <i>P.aeruginosa</i> N17_1     | NZ_CP014948 | Chromosome | <i>bla</i> <sub>OXA-396/494</sub> (100/99.74)<br><i>bla</i> <sub>PAO</sub> (100/99.58)    | Not detected |
| <i>P.aeruginosa</i> NCTC9433  | LS483497    | Chromosome | <i>bla</i> <sub>OXA-395</sub> (100/99.11)<br><i>bla</i> <sub>PAO</sub> (100/99.16)        | Not detected |
| <i>P.aeruginosa</i> NCTC10332 | NZ_LN831024 | Chromosome | <i>bla</i> <sub>OXA-50/396/494</sub> (100/99.74)<br><i>bla</i> <sub>PAO</sub> (100/99.58) | Not detected |
| <i>P.aeruginosa</i> NCTC10728 | NZ_LR134342 | Chromosome | <i>bla</i> <sub>OXA-396/494</sub> (100/99.49)<br><i>bla</i> <sub>PAO</sub> (100/100)      | Not detected |
| <i>P.aeruginosa</i> NCTC11445 | NZ_LR134308 | Chromosome | <i>bla</i> <sub>OXA-486</sub> (100/99.87)<br><i>bla</i> <sub>PAO</sub> (100/99.83)        | Not detected |
| <i>P.aeruginosa</i> NCTC12903 | NZ_LR134309 | Chromosome | <i>bla</i> <sub>OXA-395</sub> (100/100)<br><i>bla</i> <sub>PAO</sub> (100/99.24)          | Not detected |
| <i>P.aeruginosa</i> NCTC13359 | NZ_LR590473 | Chromosome | <i>bla</i> <sub>OXA-486</sub> (100/99.74)<br><i>bla</i> <sub>PAO</sub> (100/99.58)        | Not detected |
| <i>P.aeruginosa</i> NCTC13618 | NZ_LR590474 | Chromosome | <i>bla</i> <sub>OXA-396/494</sub> (100/99.74)<br><i>bla</i> <sub>PAO</sub> (100/99.49)    | Not detected |
| <i>P.aeruginosa</i> NCTC13620 | NZ_LR590472 | Chromosome | <i>bla</i> <sub>OXA-50</sub> (100/100)<br><i>bla</i> <sub>PAO</sub> (100/99.66)           | Not detected |
| <i>P.aeruginosa</i> NHmuc     | NZ_CP013479 | Chromosome | <i>bla</i> <sub>OXA-396/494</sub> (100/99.61)<br><i>bla</i> <sub>PAO</sub> (100/99.58)    | Not detected |

|                                |             |            |                                                                                        |              |
|--------------------------------|-------------|------------|----------------------------------------------------------------------------------------|--------------|
| <i>P.aeruginosa</i> Ocean_1155 | NZ_CP022526 | Chromosome | <i>bla</i> <sub>OXA-395</sub> (100/100)<br><i>bla</i> <sub>PAO</sub> (100/98.99)       | Not detected |
| <i>P.aeruginosa</i> Ocean_1175 | NZ_CP022525 | Chromosome | <i>bla</i> <sub>OXA-395</sub> (100/100)<br><i>bla</i> <sub>PAO</sub> (100/98.99)       | Not detected |
| <i>P.aeruginosa</i> PA_3       | CP033084    | Chromosome | <i>bla</i> <sub>OXA-396/494</sub> (100/99.74)<br><i>bla</i> <sub>PAO</sub> (100/99.58) | Not detected |
| <i>P.aeruginosa</i> PA_150577  | NZ_CP017306 | Chromosome | <i>bla</i> <sub>OXA-488</sub> (100/99.49)<br><i>bla</i> <sub>PAO</sub> (100/99.58)     | Not detected |
| <i>P.aeruginosa</i> PA_154197  | NZ_CP014866 | Chromosome | <i>bla</i> <sub>OXA-396</sub> (100/100)<br><i>bla</i> <sub>PAO</sub> (100/99.66)       | Not detected |
| <i>P.aeruginosa</i> PA_D1      | NZ_CP012585 | Chromosome | <i>bla</i> <sub>OXA-395</sub> (100/99.87)<br><i>bla</i> <sub>PAO</sub> (100/99.49)     | Not detected |
| <i>P.aeruginosa</i> PA_D2      | NZ_CP012578 | Chromosome | <i>bla</i> <sub>OXA-395</sub> (100/99.87)<br><i>bla</i> <sub>PAO</sub> (100/99.49)     | Not detected |
| <i>P.aeruginosa</i> PA_D5      | NZ_CP012579 | Chromosome | <i>bla</i> <sub>OXA-395</sub> (100/99.87)<br><i>bla</i> <sub>PAO</sub> (100/99.49)     | Not detected |
| <i>P.aeruginosa</i> PA_D9      | NZ_CP012580 | Chromosome | <i>bla</i> <sub>OXA-395</sub> (100/99.87)<br><i>bla</i> <sub>PAO</sub> (100/99.49)     | Not detected |
| <i>P.aeruginosa</i> PA_D16     | NZ_CP012581 | Chromosome | <i>bla</i> <sub>OXA-395</sub> (100/99.87)<br><i>bla</i> <sub>PAO</sub> (100/99.49)     | Not detected |
| <i>P.aeruginosa</i> PA_D21     | NZ_CP012582 | Chromosome | <i>bla</i> <sub>OXA-395</sub> (100/99.87)<br><i>bla</i> <sub>PAO</sub> (100/99.49)     | Not detected |
| <i>P.aeruginosa</i> PA_D22     | NZ_CP012583 | Chromosome | <i>bla</i> <sub>OXA-395</sub> (100/99.87)<br><i>bla</i> <sub>PAO</sub> (100/99.49)     | Not detected |

|                                  |                            |                                     |                                                                                                                              |              |
|----------------------------------|----------------------------|-------------------------------------|------------------------------------------------------------------------------------------------------------------------------|--------------|
| <i>P.aeruginosa</i> PA_D25       | NZ_CP012584                | Chromosome                          | <i>bla</i> <sub>OXA-395</sub> (100/99.87)<br><i>bla</i> <sub>PAO</sub> (100/99.49)                                           | Not detected |
| <i>P.aeruginosa</i> PA1          | NC_022808                  | Chromosome                          | <i>bla</i> <sub>OXA-50</sub> (100/99.61)<br><i>bla</i> <sub>PAO</sub> (100/99.49)                                            | Not detected |
| <i>P.aeruginosa</i> PA1R         | NC_022806                  | Chromosome                          | <i>bla</i> <sub>OXA-50</sub> (100/99.61)<br><i>bla</i> <sub>PAO</sub> (100/99.49)                                            | Not detected |
| <i>P.aeruginosa</i> PA1RG        | NZ_CP012679                | Chromosome                          | <i>bla</i> <sub>OXA-50</sub> (100/99.61)<br><i>bla</i> <sub>PAO</sub> (100/99.49)                                            | Not detected |
| <i>P.aeruginosa</i> PA14Or_reads | NZ_LT608330                | Chromosome                          | <i>bla</i> <sub>OXA-488</sub> (100/100)<br><i>bla</i> <sub>PAO</sub> (100/99.33)                                             | Not detected |
| <i>P.aeruginosa</i> PA34         | NZ_CP032552                | Chromosome                          | <i>bla</i> <sub>OXA-488</sub> (100/99.87)<br><i>bla</i> <sub>PAO</sub> (100/99.24)                                           | Not detected |
| <i>P.aeruginosa</i> Pa84         | NZ_CP021999                | Chromosome                          | <i>bla</i> <sub>OXA-50</sub> (100/99.74)<br><i>bla</i> <sub>PAO</sub> (100/99.74)                                            | Not detected |
| <i>P.aeruginosa</i> Pa1242       | NZ_CP022002                | Chromosome                          | <i>bla</i> <sub>OXA-396/494</sub> (100/99.61)<br><i>bla</i> <sub>PAO</sub> (100/99.58)                                       | Not detected |
| <i>P.aeruginosa</i> PABL012      | NZ_CP031659                | Chromosome                          | <i>bla</i> <sub>OXA-50</sub> (100/99.87)<br><i>bla</i> <sub>PAO</sub> (100/99.58)                                            | Not detected |
| <i>P.aeruginosa</i> PABL017      | NZ_CP031660                | Chromosome                          | <i>bla</i> <sub>OXA-50</sub> (100/99.74)<br><i>bla</i> <sub>PAO</sub> (100/99.66)                                            | Not detected |
| <i>P.aeruginosa</i> PABL048      | NZ_CP039293<br>NZ_CP039294 | Chromosome<br>plasmid<br>(pPABL048) | <i>bla</i> <sub>OXA-395</sub> (100/99.61)<br><i>bla</i> <sub>PAO</sub> (100/99.24)<br><i>bla</i> <sub>OXA-10</sub> (100/100) | Not detected |

|                               |             |            |                                                                                           |              |
|-------------------------------|-------------|------------|-------------------------------------------------------------------------------------------|--------------|
| <i>P.aeruginosa</i> PAER4_119 | NZ_CP013113 | Chromosome | <i>bla</i> <sub>OXA-50/396/494</sub> (100/99.74)<br><i>bla</i> <sub>PAO</sub> (100/99.58) | Not detected |
| <i>P.aeruginosa</i> paerg000  | NZ_LR130528 | Chromosome | <i>bla</i> <sub>OXA-396/494</sub> (100/99.74)<br><i>bla</i> <sub>PAO</sub> (100/99.41)    | Not detected |
| <i>P.aeruginosa</i> paerg002  | NZ_LR130527 | Chromosome | <i>bla</i> <sub>OXA-488</sub> (100/99.49)<br><i>bla</i> <sub>PAO</sub> (100/99.58)        | Not detected |
| <i>P.aeruginosa</i> paerg003  | NZ_LR130530 | Chromosome | <i>bla</i> <sub>OXA-488</sub> (100/99.49)<br><i>bla</i> <sub>PAO</sub> (100/99.58)        | Not detected |
| <i>P.aeruginosa</i> paerg004  | NZ_LR130531 | Chromosome | <i>bla</i> <sub>OXA-488</sub> (100/99.49)<br><i>bla</i> <sub>PAO</sub> (100/99.58)        | Not detected |
| <i>P.aeruginosa</i> paerg005  | NZ_LR130534 | Chromosome | <i>bla</i> <sub>OXA-50</sub> (100/99.23)<br><i>bla</i> <sub>PAO</sub> (100/99.24)         | Not detected |
| <i>P.aeruginosa</i> paerg009  | NZ_LR130533 | Chromosome | <i>bla</i> <sub>OXA-50</sub> (100/99.23)<br><i>bla</i> <sub>PAO</sub> (100/99.24)         | Not detected |
| <i>P.aeruginosa</i> paerg010  | NZ_LR130536 | Chromosome | <i>bla</i> <sub>OXA-488</sub> (100/99.49)<br><i>bla</i> <sub>PAO</sub> (100/99.58)        | Not detected |
| <i>P.aeruginosa</i> paerg011  | NZ_LR130535 | Chromosome | <i>bla</i> <sub>OXA-488</sub> (100/99.49)<br><i>bla</i> <sub>PAO</sub> (100/99.58)        | Not detected |
| <i>P.aeruginosa</i> paerg012  | NZ_LR130537 | Chromosome | <i>bla</i> <sub>OXA-488</sub> (100/99.49)<br><i>bla</i> <sub>PAO</sub> (100/99.58)        | Not detected |
| <i>P.aeruginosa</i> PAK_1     | LR657304    | Chromosome | <i>bla</i> <sub>OXA-396/494</sub> (100/99.74)<br><i>bla</i> <sub>PAO</sub> (100/99.16)    | Not detected |
| <i>P.aeruginosa</i> PAK_2     | NZ_CP020659 | Chromosome | <i>bla</i> <sub>OXA-396/494</sub> (100/99.74)<br><i>bla</i> <sub>PAO</sub> (100/99.16)    | Not detected |

|                                |                            |                                     |                                                                                                                                                                                                                      |              |
|--------------------------------|----------------------------|-------------------------------------|----------------------------------------------------------------------------------------------------------------------------------------------------------------------------------------------------------------------|--------------|
| <i>P.aeruginosa</i> PAO1       | NC_002516                  | Chromosome                          | <i>bla</i> <sub>OXA-50</sub> (100/99.87)<br><i>bla</i> <sub>PAO</sub> (100/100)                                                                                                                                      | Not detected |
| <i>P.aeruginosa</i> PAO1_Orsay | NZ_LN871187                | Chromosome                          | <i>bla</i> <sub>OXA-50</sub> (100/99.87)<br><i>bla</i> <sub>PAO</sub> (100/100)                                                                                                                                      | Not detected |
| <i>P.aeruginosa</i> PAO1161    | NZ_CP032126                | Chromosome                          | <i>bla</i> <sub>OXA-50</sub> (100/99.87)<br><i>bla</i> <sub>PAO</sub> (100/100)                                                                                                                                      | Not detected |
| <i>P.aeruginosa</i> PB350      | NZ_CP025055                | Chromosome                          | <i>bla</i> <sub>OXA-488</sub> (100/99.87)<br><i>bla</i> <sub>PAO</sub> (100/99.16)                                                                                                                                   | Not detected |
| <i>P.aeruginosa</i> PB353      | NZ_CP025051<br>NZ_CP025052 | Chromosome<br>plasmid<br>(pPB353_1) | <i>bla</i> <sub>OXA-50</sub> (100/99.61)<br><i>bla</i> <sub>PAO</sub> (100/99.83)<br><i>bla</i> <sub>CTX-M-30</sub> (100/99.77)<br><i>bla</i> <sub>OXA-101</sub> (100/100)<br><i>bla</i> <sub>TEM-1B</sub> (100/100) | Not detected |
| <i>P.aeruginosa</i> PB354      | NZ_CP025053                | Chromosome                          | <i>bla</i> <sub>OXA-50</sub> (100/99.61)<br><i>bla</i> <sub>PAO</sub> (100/99.83)<br><i>bla</i> <sub>CTX-M-30</sub> (100/99.77)<br><i>bla</i> <sub>OXA-101</sub> (100/100)<br><i>bla</i> <sub>TEM-1B</sub> (100/100) | Not detected |
| <i>P.aeruginosa</i> PB367      | NZ_CP025056                | Chromosome                          | <i>bla</i> <sub>OXA-488</sub> (100/99.87)<br><i>bla</i> <sub>PAO</sub> (100/99.24)                                                                                                                                   | Not detected |
| <i>P.aeruginosa</i> PB368      | NZ_CP025050                | Chromosome                          | <i>bla</i> <sub>OXA-488</sub> (100/99.87)<br><i>bla</i> <sub>PAO</sub> (100/99.07)                                                                                                                                   | Not detected |
| <i>P.aeruginosa</i> PB369      | NZ_CP025049                | Chromosome                          | <i>bla</i> <sub>OXA-488</sub> (100/99.87)<br><i>bla</i> <sub>PAO</sub> (100/98.99)                                                                                                                                   | Not detected |



|                              |                                           |                                                              |                                                                                           |              |
|------------------------------|-------------------------------------------|--------------------------------------------------------------|-------------------------------------------------------------------------------------------|--------------|
| <i>P.aeruginosa</i> Pcyll-10 | NZ_LT673656                               | Chromosome                                                   | <i>bla</i> <sub>OXA-485/488</sub> (100/99.36)<br><i>bla</i> <sub>PAO</sub> (100/99.58)    | Not detected |
| <i>P.aeruginosa</i> PPF-1    | NZ_CP023316                               | Chromosome                                                   | <i>bla</i> <sub>OXA-395</sub> (100/99.23)<br><i>bla</i> <sub>PAO</sub> (100/99.99)        | Not detected |
| <i>P.aeruginosa</i> RP73     | NC_021577                                 | Chromosome                                                   | <i>bla</i> <sub>OXA-50</sub> (100/100)<br><i>bla</i> <sub>PAO</sub> (100/99.74)           | Not detected |
| <i>P.aeruginosa</i> RW109    | NZ_LT969520<br>NZ_LT969519<br>NZ_LT969521 | Chromosome<br>plasmid1<br>(unnamed)<br>plasmid2<br>(unnamed) | <i>bla</i> <sub>OXA-395</sub> (100/100)<br><i>bla</i> <sub>PAO</sub> (100/99.83)          | Not detected |
| <i>P.aeruginosa</i> S86968   | NZ_CP008865                               | Chromosome                                                   | <i>bla</i> <sub>OXA-396</sub> (100/100)<br><i>bla</i> <sub>PAO</sub> (100/99.24)          | Not detected |
| <i>P.aeruginosa</i> SCV20265 | NC_023149                                 | Chromosome                                                   | <i>bla</i> <sub>OXA-50/396/494</sub> (100/99.74)<br><i>bla</i> <sub>PAO</sub> (100/99.74) | Not detected |
| <i>P.aeruginosa</i> SCVFeb   | NZ_CP013477                               | Chromosome                                                   | <i>bla</i> <sub>OXA-396/494</sub> (100/99.61)<br><i>bla</i> <sub>PAO</sub> (100/99.58)    | Not detected |
| <i>P.aeruginosa</i> SCVJan   | NZ_CP013478                               | Chromosome                                                   | <i>bla</i> <sub>OXA-396/494</sub> (100/99.61)<br><i>bla</i> <sub>PAO</sub> (100/99.58)    | Not detected |
| <i>P.aeruginosa</i> SJTD-1   | NZ_CP015877                               | Chromosome                                                   | <i>bla</i> <sub>OXA-486</sub> (100/99.87)<br><i>bla</i> <sub>PAO</sub> (100/99.58)        | Not detected |
| <i>P.aeruginosa</i> T38079   | NZ_CP008866                               | Chromosome                                                   | <i>bla</i> <sub>OXA-396</sub> (100/100)<br><i>bla</i> <sub>PAO</sub> (100/99.24)          | Not detected |
| <i>P.aeruginosa</i> T52373   | NZ_CP008867                               | Chromosome                                                   | <i>bla</i> <sub>OXA-50/396/494</sub> (100/99.74)<br><i>bla</i> <sub>PAO</sub> (100/99.16) | Not detected |

|                                           |             |            |                                                                                        |              |
|-------------------------------------------|-------------|------------|----------------------------------------------------------------------------------------|--------------|
| <i>P.aeruginosa</i> T63266                | NZ_CP008868 | Chromosome | <i>bla</i> <sub>OXA-396/494</sub> (100/99.74)<br><i>bla</i> <sub>PAO</sub> (100/99.66) | Not detected |
| <i>P.aeruginosa</i> UCBPP-PA14            | NC_008463   | Chromosome | <i>bla</i> <sub>OXA-488</sub> (100/100)<br><i>bla</i> <sub>PAO</sub> (100/99.33)       | Not detected |
| <i>P.aeruginosa</i> USDA-ARS-USMARC-41639 | NZ_CP013989 | Chromosome | <i>bla</i> <sub>OXA-396/494</sub> (100/99.87)<br><i>bla</i> <sub>PAO</sub> (100/99.66) | Not detected |
| <i>P.aeruginosa</i> VA-134                | NZ_CP013245 | Chromosome | <i>bla</i> <sub>OXA-486</sub> (100/99.87)<br><i>bla</i> <sub>PAO</sub> (100/99.74)     | Not detected |
| <i>P.aeruginosa</i> W16407                | NZ_CP008869 | Chromosome | <i>bla</i> <sub>OXA-396/494</sub> (100/99.61)<br><i>bla</i> <sub>PAO</sub> (100/99.83) | Not detected |
| <i>P.aeruginosa</i> W36662                | NZ_CP008870 | Chromosome | <i>bla</i> <sub>OXA-50</sub> (100/100)<br><i>bla</i> <sub>PAO</sub> (100/99.66)        | Not detected |
| <i>P.aeruginosa</i> W45909                | NZ_CP008871 | Chromosome | <i>bla</i> <sub>OXA-396/494</sub> (100/99.74)<br><i>bla</i> <sub>PAO</sub> (100/99.49) | Not detected |
| <i>P.aeruginosa</i> W60856                | NZ_CP008864 | Chromosome | <i>bla</i> <sub>OXA-50</sub> (100/99.87)<br><i>bla</i> <sub>PAO</sub> (100/99.41)      | Not detected |
| <i>P.aeruginosa</i> WCHPA075019           | NZ_CP028584 | Chromosome | <i>bla</i> <sub>OXA-396/494</sub> (100/99.61)<br><i>bla</i> <sub>PAO</sub> (100/99.58) | Not detected |
| <i>P.aeruginosa</i> X78812                | NZ_CP008872 | Chromosome | <i>bla</i> <sub>OXA-395</sub> (100/99.87)<br><i>bla</i> <sub>PAO</sub> (100/99.58)     | Not detected |
| <i>P.aeruginosa</i> Y31                   | NZ_CP030910 | Chromosome | <i>bla</i> <sub>OXA-486</sub> (100/99.61)<br><i>bla</i> <sub>PAO</sub> (100/99.58)     | Not detected |

|                             |                                                          |                                                                                    |                                                                                                                                 |                             |
|-----------------------------|----------------------------------------------------------|------------------------------------------------------------------------------------|---------------------------------------------------------------------------------------------------------------------------------|-----------------------------|
| <i>P.aeruginosa</i> Y71     | NZ_CP030911                                              | Chromosome                                                                         | <i>bla</i> <sub>OXA-396/496</sub> (100/99.61)<br><i>bla</i> <sub>PAO</sub> (100/99.58)<br><i>bla</i> <sub>OXA-1</sub> (100/100) | Not detected                |
| <i>P.aeruginosa</i> Y82     | NZ_CP030912                                              | Chromosome                                                                         | <i>bla</i> <sub>OXA-395</sub> (100/100)<br><i>bla</i> <sub>PAO</sub> (100/99.49)<br><i>bla</i> <sub>OXA-1</sub> (100/100)       | Not detected                |
| <i>P.aeruginosa</i> Y89     | NZ_CP030913<br>NZ_CP030914                               | Chromosome<br>plasmid<br>(pY89)                                                    | <i>bla</i> <sub>OXA-396/496</sub> (100/99.61)<br><i>bla</i> <sub>PAO</sub> (100/99.58)<br><i>bla</i> <sub>OXA-1</sub> (100/100) | Not detected                |
| <i>P.aeruginosa</i> YL84    | NZ_CP007147                                              | Chromosome                                                                         | <i>bla</i> <sub>OXA-396</sub> (100/100)<br><i>bla</i> <sub>PAO</sub> (100/99.33)                                                | Not detected                |
| <i>P.aeruginosa</i> AR_0356 | NZ_CP027169<br>NZ_CP027168<br>NZ_CP027170<br>NZ_CP027167 | Chromosome<br>plasmid<br>(unnamed)<br>plasmid<br>(unnamed)<br>plasmid<br>(unnamed) | Not detected                                                                                                                    | <i>bla</i> <sub>KPC-2</sub> |
| <i>P.aeruginosa</i> AR441   | NZ_CP029093NZ_CP029091NZ_CP029092<br>NZ_CP029094         | Chromosome<br>plasmid<br>(unnamed)<br>plasmid<br>(unnamed)<br>plasmid (unnamed)    | Not detected                                                                                                                    | <i>bla</i> <sub>KPC-2</sub> |

|                                |                            |                                    |              |              |
|--------------------------------|----------------------------|------------------------------------|--------------|--------------|
| <i>P.aeruginosa</i> AZPAE15042 | NZ_CP041354<br>NZ_CP041355 | Chromosome<br>plasmid<br>(pIHMA87) | Not detected | Not detected |
| <i>P.aeruginosa</i> PA7        | NC_009656                  | Chromosome                         | Not detected | Not detected |
| <i>P.aeruginosa</i> NCTC13718  | LS483402                   | Chromosome                         | Not detected | Not detected |
| <i>P.aeruginosa</i> CR1        | NZ_CP020560                | Chromosome                         | Not detected | Not detected |
